# Supplementary material
Source: PubMed Central journal article supplement (PMC5310032)
Supplement: rspb20162086supp3.pdf [file rspb20162086supp3.pdf]

**Supplementary table for:**

Castorani, M. C. N., Reed, D. C., Raimondi, P. T., Alberto, F., Bell, T. W., Cavanaugh, K. C., Siegel, D. A., & Simons, R. D. Fluctuations in population fecundity drive variation in demographic connectivity and metapopulation dynamics. *Proc. R. Soc. B Biol. Sci.* (doi:10.1098/rspb.2016.2086)

**Table S1.** Summary of connectivity measures and results of model comparisons between two different methods of fecundity estimation. Fecundity was estimated using zero intercept regression or non-zero intercept regression fit by generalized least squares (see details in electronic supplementary materials, appendix S1). AIC model comparisons are described by the AIC values and ranked by AIC differences ( $\Delta_i$ ). The effect of each connectivity measure on the probability of patch occupancy is shown by the estimate of the standardized regression coefficient for the connectivity term.

| Model | Fecundity estimated with zero intercept regression |        |            |      | Fecundity estimated with non-zero intercept regression |        |            |      |
|-------|----------------------------------------------------|--------|------------|------|--------------------------------------------------------|--------|------------|------|
|       | Standardized coefficient for connectivity term     | AIC    | $\Delta_i$ | Rank | Standardized coefficient for connectivity term         | AIC    | $\Delta_i$ | Rank |
| 0     | NA                                                 | 7187.7 | 93.5       | 7    | NA                                                     | 7187.7 | 84.3       | 7    |
| 1     | 0.56                                               | 7177.3 | 83.0       | 6    | 0.74                                                   | 7171.7 | 68.3       | 6    |
| 2     | 0.53                                               | 7175.0 | 80.8       | 5    | 0.66                                                   | 7171.0 | 67.7       | 5    |
| 3     | 0.76                                               | 7143.0 | 48.7       | 4    | 0.81                                                   | 7143.9 | 40.6       | 4    |
| 4     | 0.83                                               | 7130.9 | 36.6       | 3    | 0.88                                                   | 7130.5 | 27.1       | 3    |
| 5     | 1.01                                               | 7107.9 | 13.6       | 2    | 1.09                                                   | 7113.6 | 10.2       | 2    |
| 6     | 1.08                                               | 7094.3 | 0          | 1    | 1.12                                                   | 7103.4 | 0          | 1    |
